# Supplementary material
Source: Copernicus journal article supplement (doi:10.5194/egusphere-2026-3353)
Supplement: Supplementary file 1 [file egusphere-2026-3353-supplement.pdf]

## Supplement

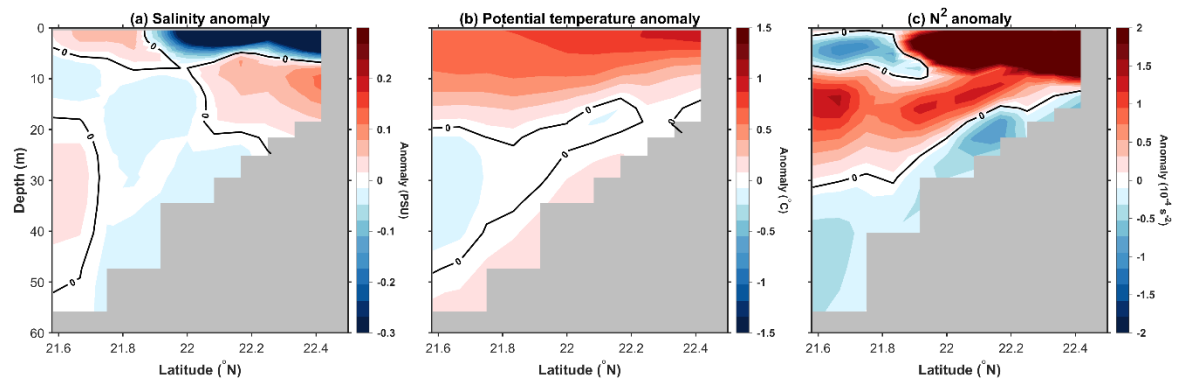

Figure S1. MHW-related summer anomalies along 114.5° E across the PRE shelf. Panels show (a) salinity anomaly, (b) potential temperature anomaly, and (c)  $N^2$  anomaly. Grey shading indicates seafloor bathymetry or masked grid cells.
